# Supplementary material
Source: PubMed Central journal article supplement (PMC2782762)
Supplement: NIHMS126507-supplement-1.pdf [file NIHMS126507-supplement-1.pdf]

## SUPPLEMENTAL MATERIAL

**Table S1. Unadjusted and adjusted relative hazard (RH) of SCD by rs16847548 and rs12567209 genotypes in blacks from ARIC and CHS**

|                | rs16847548       |                              |                     | rs12567209       |                              |                     |
|----------------|------------------|------------------------------|---------------------|------------------|------------------------------|---------------------|
|                | TT               | TC                           | CC                  | GG               | AG                           | AA                  |
| No SCD         | N=2,879<br>66.1% | N=1,331<br>30.5%             | N=148<br>3.4%       | N=3,755<br>86.4% | N=569<br>13.1%               | N=23<br>0.5%        |
| SCD            | N=99<br>62.3%    | N=57<br>35.8%                | N=3<br>1.9%         | N=134<br>82.2%   | N=27<br>16.6%                | N=2<br>1.2%         |
| RH<br>(95% CI) | 1.00<br>(ref.)   | 1.24<br>(0.89-1.72)          | 0.61<br>(0.19-1.93) | 1.00<br>(ref.)   | 1.28<br>(0.85-1.94)          | 2.22<br>(0.55-8.98) |
| Model 1        | 1.00<br>(ref)    | 1.07<br>(0.81-1.41)          |                     | 1.00<br>(ref.)   | 1.40<br>(0.97-2.03)          |                     |
| Model 2        | P value<br>1.00  | 0.64<br>1.12<br>(0.85, 1.49) |                     | P value<br>1.00  | 0.07<br>1.49<br>(1.02, 2.17) |                     |
| Model 3        | P value<br>1.00  | 0.41<br>1.15<br>(0.86-1.52)  |                     | P value<br>1.00  | 0.04<br>1.56<br>(1.07, 2.27) |                     |
| Model 4        | P value<br>1.00  | 0.34<br>1.28<br>(0.92-1.76)  |                     | P value<br>1.00  | 0.02<br>1.56<br>(1.00, 2.42) |                     |
|                | P value          | 0.14                         |                     | P value          | 0.05                         |                     |

*P* Value obtained from regression model assuming additive genetic model

Model 1 included age, sex, and study

Model 2 included model 1 + both rs16847548 and rs12567209

Model 3 = model 2 + heart rate (continuous) and QT-interval (quintiles)

Model 4 = model 3+ current marital and smoking status, education, BMI, total cholesterol and fibrinogen levels, hypertension, diabetes, and history of MI, heart rate (continuous) and QT-interval (quintiles)

**Table S2. Relative hazards of SCD associated with rs16847548 in whites, stratified by established cardiovascular risk factors at baseline**

|                             | N      | HR   | 95% CI      | P Value |
|-----------------------------|--------|------|-------------|---------|
| ARIC                        | 10,447 | 1.34 | (1.04-1.73) | 0.023   |
| CHS                         | 4,176  | 1.29 | (1.02-1.64) | 0.033   |
| No History of MI            | 13,801 | 1.39 | (1.13-1.70) | 0.002   |
| History of MI               | 792    | 1.06 | (0.76-1.48) | 0.742   |
| Women*                      | 7,914  | 1.53 | (1.13-2.07) | 0.006   |
| Men                         | 6,709  | 1.23 | (1.00-1.52) | 0.053   |
| Age at last follow up <70** | 6,186  | 1.45 | (1.09-1.93) | 0.010   |
| Age at last follow up ≥70   | 8,437  | 1.27 | (1.03-1.58) | 0.029   |
| No diabetes                 | 13,083 | 1.39 | (1.14-1.69) | 0.001   |
| Diabetes                    | 1,508  | 1.08 | (0.75-1.55) | 0.672   |
| No Hypertension             | 9,436  | 1.29 | (0.99-1.68) | 0.059   |
| Hypertension                | 5,134  | 1.39 | (1.10-1.74) | 0.005   |
| No family history of CVD    | 6,674  | 1.26 | (0.95-1.67) | 0.104   |
| Family history of CVD       | 7,570  | 1.40 | (1.11-1.77) | 0.004   |
| BMI < 30 kg/m <sup>2</sup>  | 11,496 | 1.28 | (1.05-1.57) | 0.017   |
| BMI ≥ 30 kg/m <sup>2</sup>  | 3,070  | 1.46 | (1.05-2.03) | 0.024   |
| HDL < 40 mg/dL              | 3,781  | 1.33 | (1.02-1.74) | 0.037   |
| HDL ≥ 40 mg/dL              | 10,774 | 1.37 | (1.09-1.72) | 0.007   |
| Not current smoker          | 9,803  | 1.29 | (1.02-1.62) | 0.032   |
| Current smoker              | 4,770  | 1.38 | (1.06-1.84) | 0.017   |
| LDL < 130 mg/dL             | 6,671  | 1.28 | (0.98-1.66) | 0.070   |
| LDL ≥ 130 mg/dL             | 7,914  | 1.38 | (1.09-1.74) | 0.006   |

No tests of interaction between genotype, cardiovascular risk factor, and SCD were statistically significant ( $P < 0.05$ ). *P* Value is stratum-specific *P* Value assuming additive genetic model for rs16847548

\*Model adjusted for only age

\*\*Model adjusted for only sex

**Table S3. Relative hazards of SCD associated with rs12567209 in whites, stratified by established cardiovascular risk factors at baseline**

|                             | N      | HR   | 95% CI        | P Value |
|-----------------------------|--------|------|---------------|---------|
| ARIC                        | 10,377 | 0.76 | (0.47 – 1.24) | 0.27    |
| CHS                         | 4,151  | 0.42 | (0.23 – 0.75) | 0.003   |
| No History of MI            | 13,696 | 0.49 | (0.30 – 0.78) | 0.003   |
| History of MI               | 802    | 0.87 | (0.48 – 1.60) | 0.66    |
| Women*                      | 7,850  | 0.54 | (0.27 – 1.06) | 0.07    |
| Men                         | 6,678  | 0.58 | (0.37 – 0.92) | 0.02    |
| Age at last follow up <70** | 6,130  | 0.93 | (0.56 – 1.54) | 0.79    |
| Age at last follow up ≥70   | 8,437  | 0.39 | (0.22 – 0.68) | 0.001   |
| No diabetes                 | 13,003 | 0.62 | (0.41 – 0.93) | 0.02    |
| Diabetes                    | 1,493  | 0.43 | (0.18 – 1.05) | 0.06    |
| No Hypertension             | 9,373  | 0.79 | (0.48 – 1.32) | 0.37    |
| Hypertension                | 5,100  | 0.42 | (0.24 – 0.73) | 0.002   |
| No family history of CVD    | 6,652  | 0.49 | (0.26 – 0.93) | 0.03    |
| Family history of CVD       | 7,538  | 0.57 | (0.35 – 0.95) | 0.03    |
| BMI < 30 kg/m <sup>2</sup>  | 11,455 | 0.42 | (0.25 – 0.69) | 0.001   |
| BMI ≥ 30 kg/m <sup>2</sup>  | 3,056  | 1.02 | (0.58 – 1.80) | 0.93    |
| HDL < 40 mg/dL              | 3,774  | 0.66 | (0.38 – 1.13) | 0.13    |
| HDL ≥ 40 mg/dL              | 10,723 | 0.51 | (0.30 – 0.86) | 0.01    |
| Not current smoker          | 9,775  | 0.41 | (0.23 – 0.73) | 0.003   |
| Current smoker              | 4,743  | 0.79 | (0.48 – 1.29) | 0.34    |
| LDL < 130 mg/dL             | 6,653  | 0.62 | (0.34 – 1.05) | 0.08    |
| LDL ≥ 130 mg/dL             | 7,875  | 0.55 | (0.33 – 0.91) | 0.02    |

No tests of interaction between genotype, cardiovascular risk factor, and SCD were statistically significant ( $P < 0.05$ ) except for p value of 0.02 for age at last follow up and for obesity. *P* Value is stratum-specific *P* Value assuming additive genetic model for rs12567209

\*Model adjusted for only age

\*\*Model adjusted for only sex
